# Supplementary material for: Coexpression analysis of large cancer datasets provides insight into the cellular phenotypes of the tumour microenvironment
Source: PubMed Central journal article supplement (PMC3721986; doi:10.1186/1471-2164-14-469), 2013-07-11

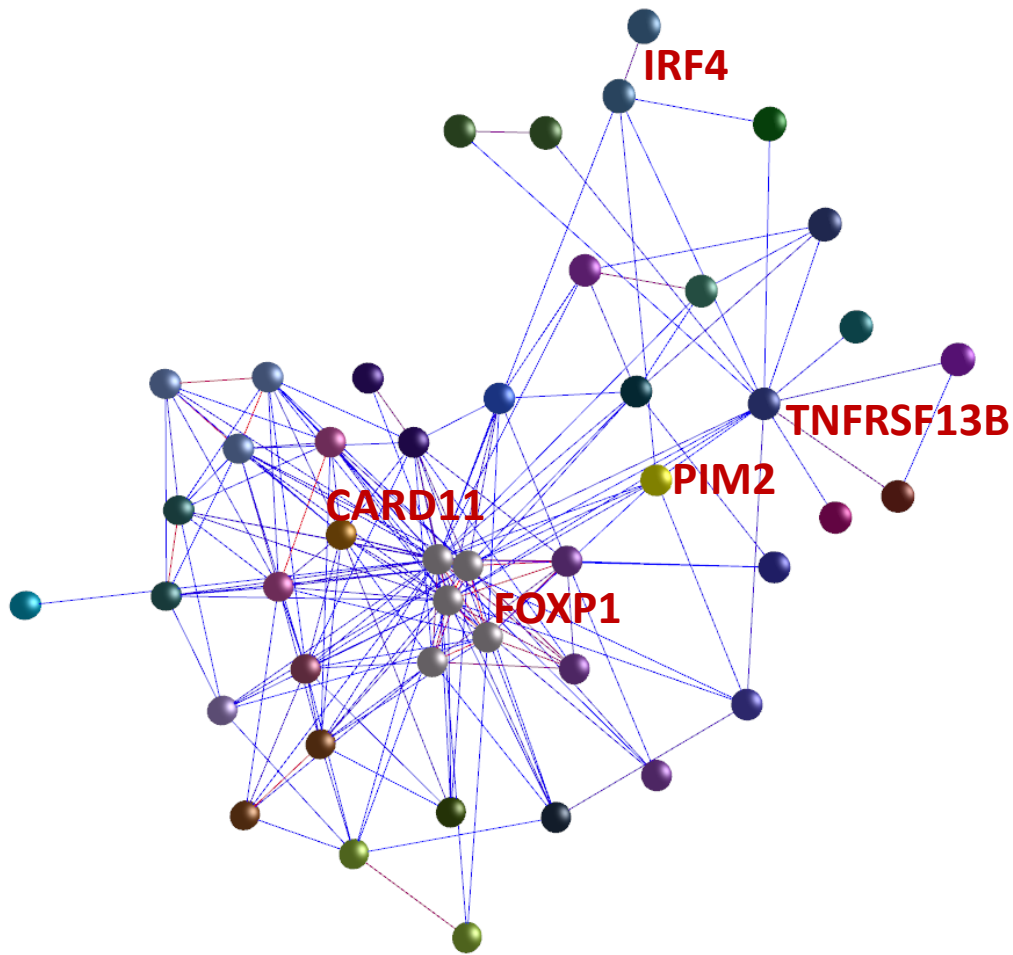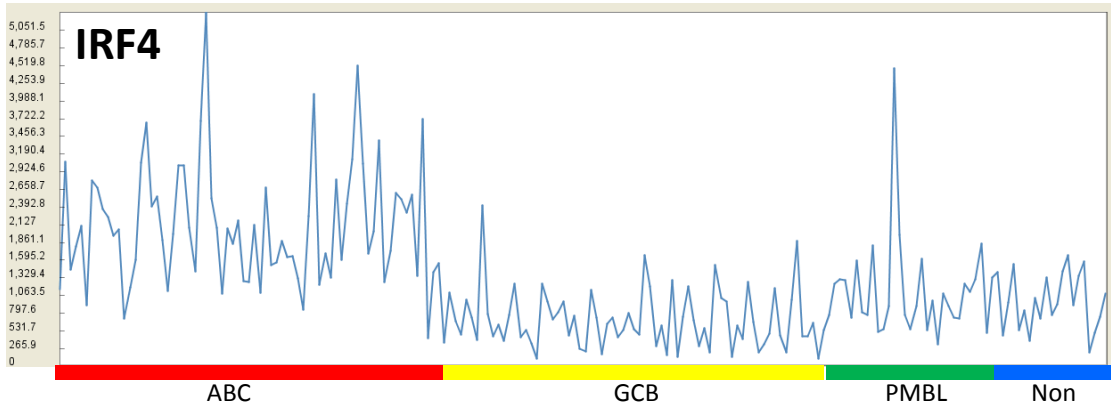

Supplement: 1471-2164-14-469-S3.pdf [file 1471-2164-14-469-S3.pdf]
